# Supplementary material
Source: PubMed Central journal article supplement (PMC4096364)
Supplement: 2b0f6a0130f95252f4616a6af406fc97_genetics.114.164814-6.pdf [file 2b0f6a0130f95252f4616a6af406fc97_genetics.114.164814-6.pdf]

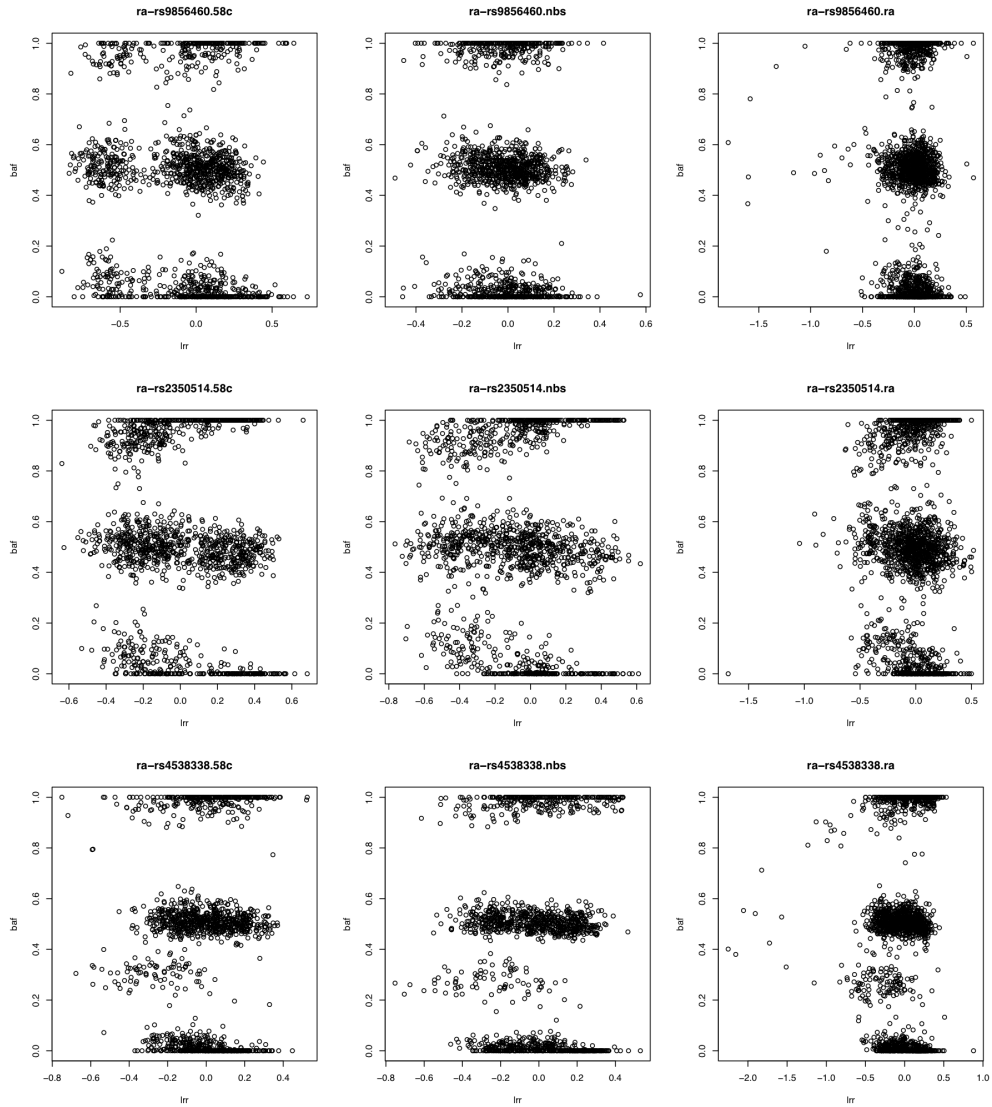

Figure S5: Cluster plots for three SNPs in gene *CLSNT2* (on chromosome 3), which shows a strong association with rheumatoid arthritis. After these three SNPs were removed, the signal disappeared.
