# Supplementary material
Source: PubMed Central journal article supplement (PMC4096364)
Supplement: 7c1c36ab8fd56d256eb4285c34339e63_genetics.114.164814-5.pdf [file 7c1c36ab8fd56d256eb4285c34339e63_genetics.114.164814-5.pdf]

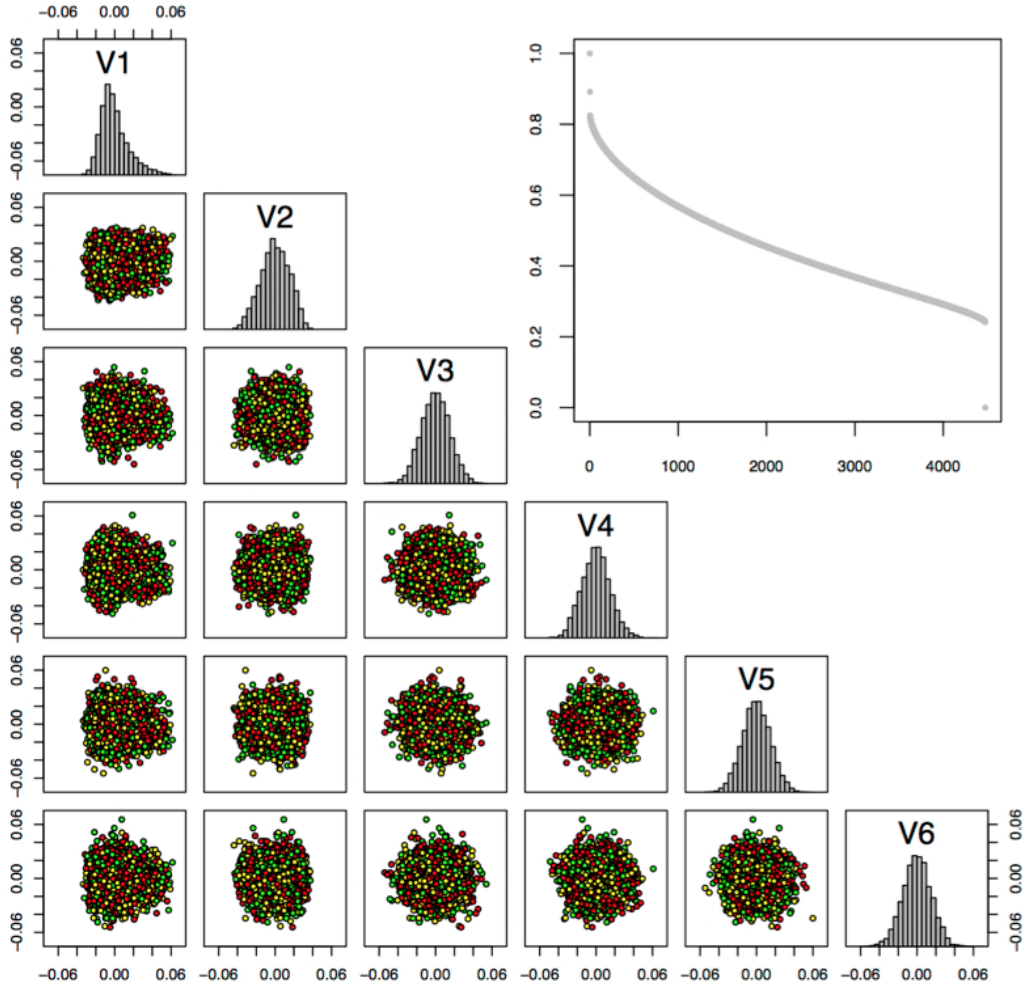

Figure S1: Pairwise plots of top 6 eigenvectors, their histogram, and all eigenvalues (scaled according to the largest eigenvalue) of rheumatoid arthritis data. Red dots denote cases, green dots denote 58BC controls and yellow dots denote NBS controls.
