# Supplementary material
Source: PubMed Central journal article supplement (PMC4096364)
Supplement: 81f1b0ea3643a07e2618f07079c4a1cd_genetics.114.164814-4.pdf [file 81f1b0ea3643a07e2618f07079c4a1cd_genetics.114.164814-4.pdf]

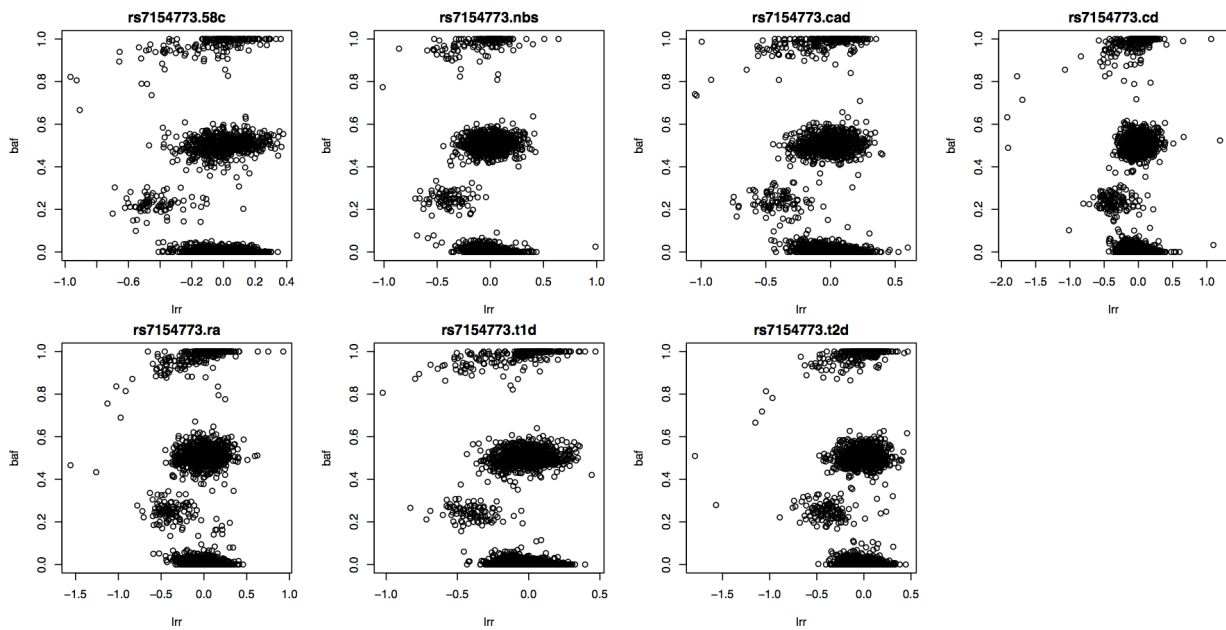

Figure S2: Cluster plot for SNP rs7154773 for two controls and five disease cases. There is a fourth cluster in all seven samples. In each panel, the x-axis is the logR-Ratio (LRR), and the y-axis is the B-allele frequency (BAF). The LRR is a normalized measure of the total signal intensity for two alleles of the SNP. The BAF is a normalized measure of the allelic intensity ratio of two alleles.
