# Supplementary material
Source: PubMed Central journal article supplement (PMC4096364)
Supplement: d49a0b1ba4b30ed4e251dea4fe110f33_genetics.114.164814-3.pdf [file d49a0b1ba4b30ed4e251dea4fe110f33_genetics.114.164814-3.pdf]

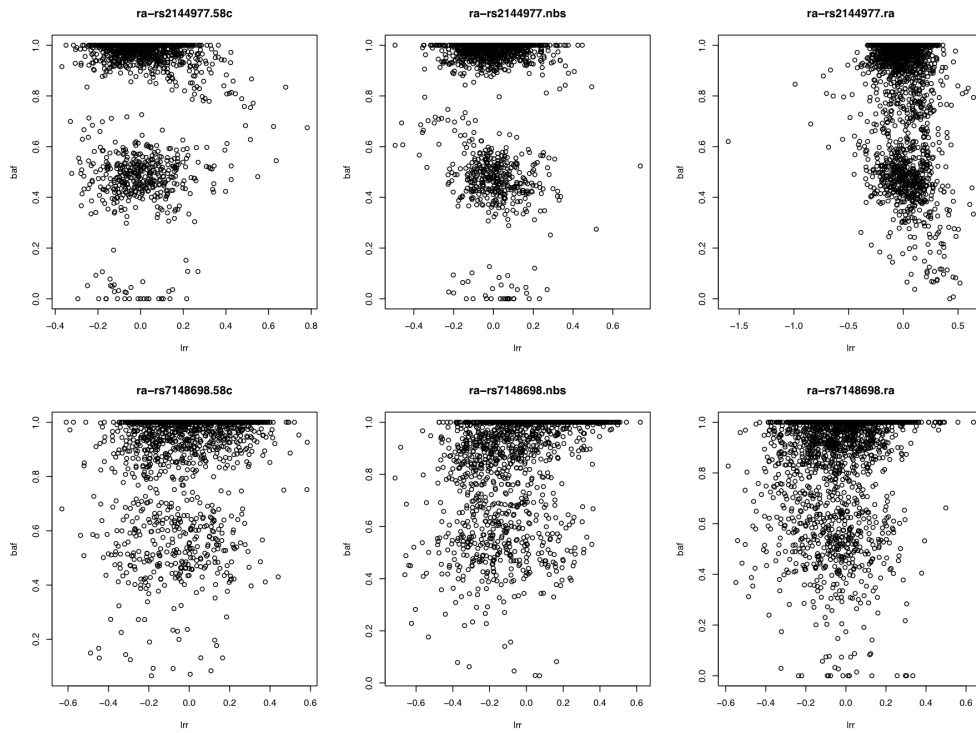

Figure S6: Cluster plots of two SNPs near gene *NID2* (on chromosome 14), which shows a strong association with rheumatoid arthritis. After these two SNPs were removed, the signal disappeared.
