# Supplementary material
Source: PubMed Central journal article supplement (PMC4096364)
Supplement: d449b03e7217dcdd08213141ceb375b3_genetics.114.164814-8.pdf [file d449b03e7217dcdd08213141ceb375b3_genetics.114.164814-8.pdf]

Table S1: Numbers of samples and SNPs in the final analysis.

|          | CAD     | CD      | RA      | T1D     | T2D     |
|----------|---------|---------|---------|---------|---------|
| Cases    | 1,856   | 1,566   | 1,739   | 1,912   | 1,806   |
| Controls | 2,826   | 2,770   | 2,737   | 2,869   | 2,729   |
| SNPs     | 394,589 | 395,452 | 395,003 | 394,681 | 394,951 |
