# Supplementary material
Source: PubMed Central journal article supplement (PMC4096364)
Supplement: daf75595797b0bf08a63c7a7752c76cc_genetics.114.164814-7.pdf [file daf75595797b0bf08a63c7a7752c76cc_genetics.114.164814-7.pdf]

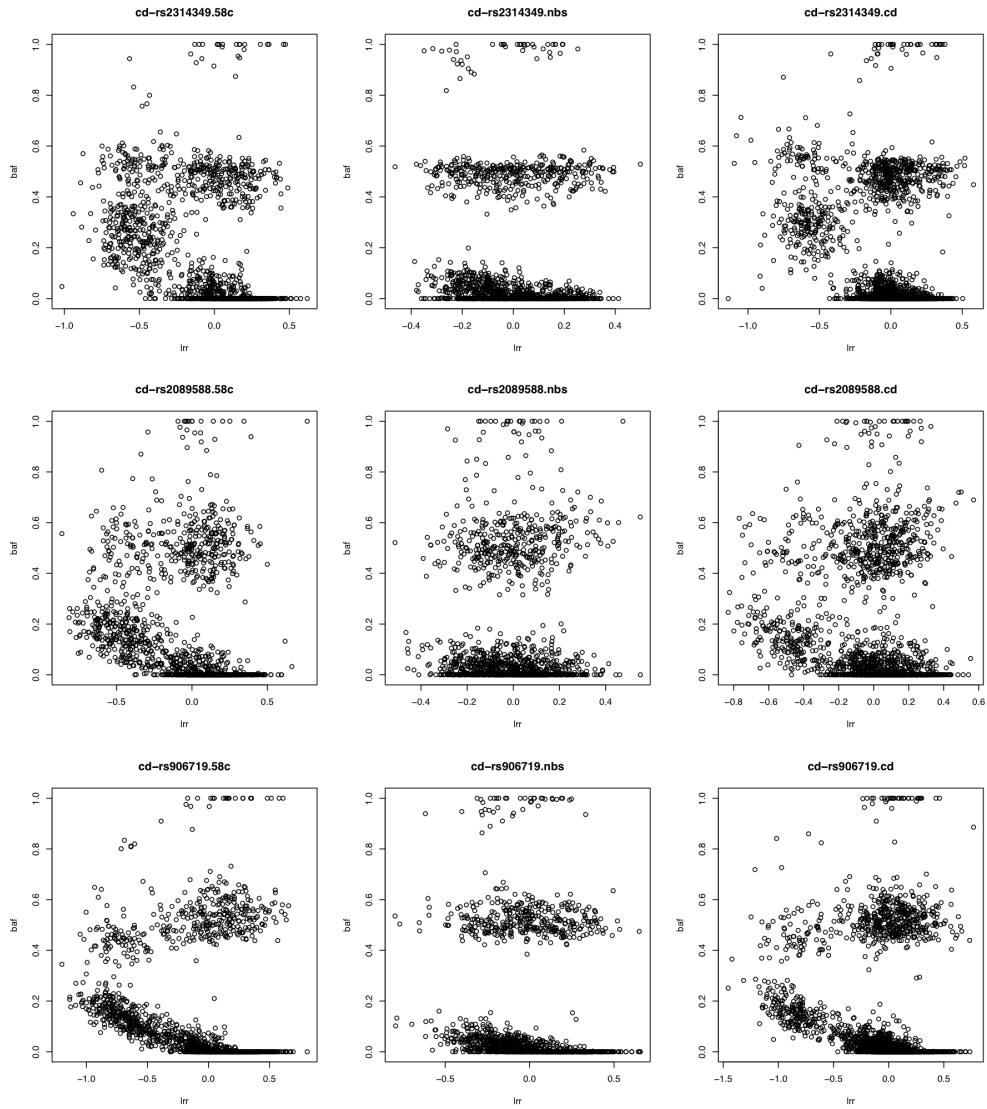

Figure S4: Cluster plots for three SNPs in gene *MCF2L2* (on chromosome 3), which shows a strong association with Crohn's disease. After these three SNPs were removed, the signal disappeared.
