# Supplementary material
Source: PubMed Central journal article supplement (PMC4096364)

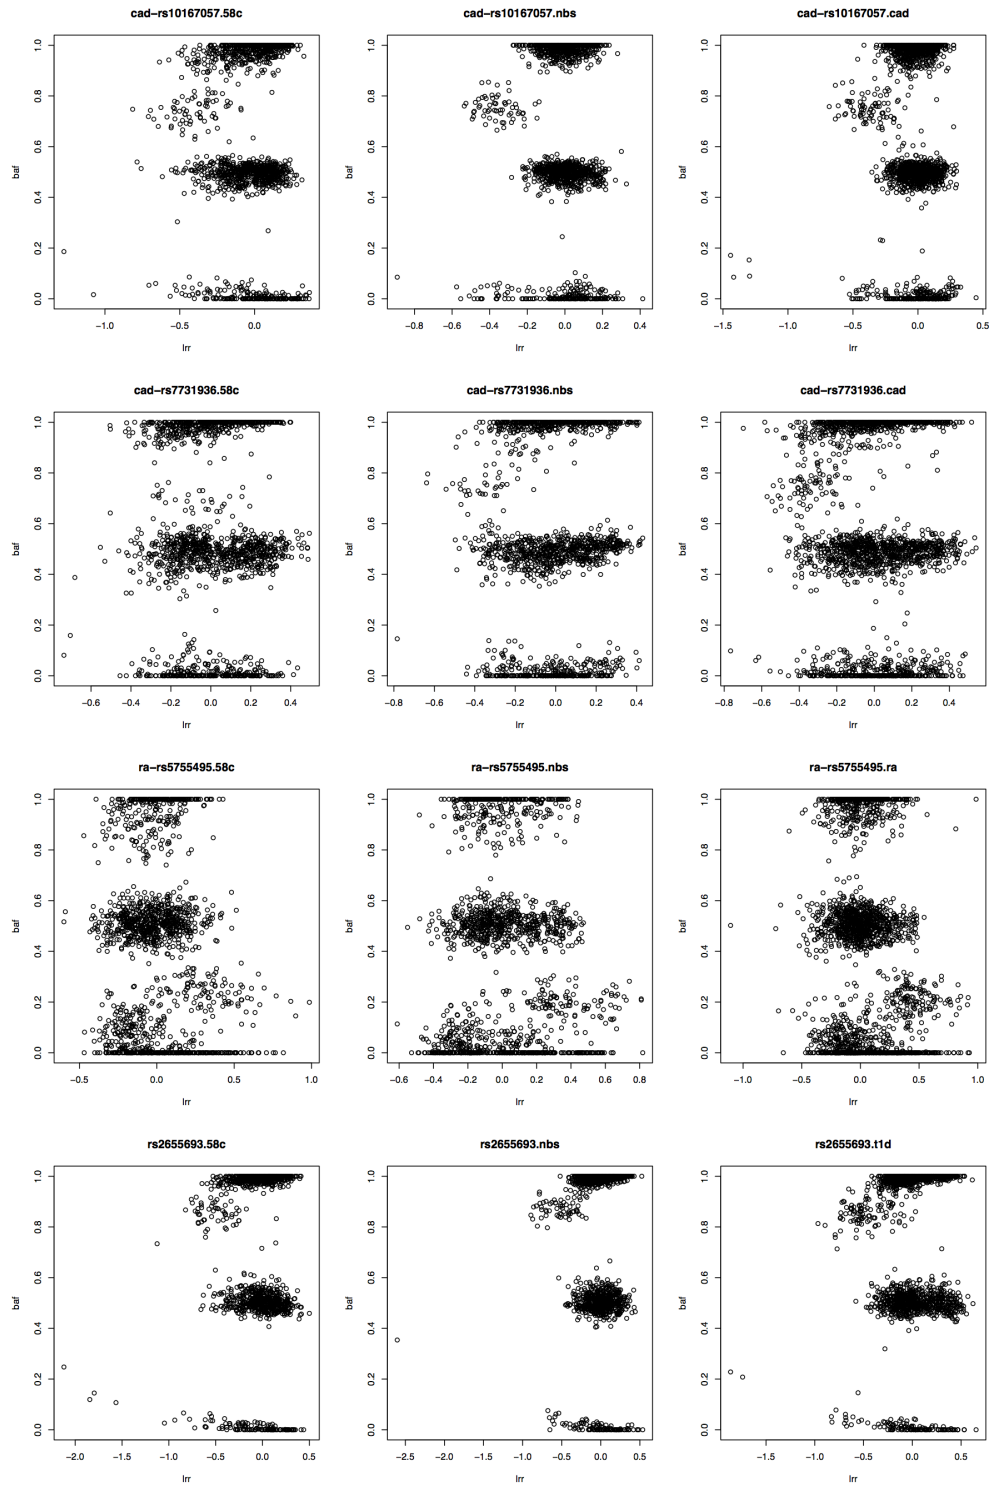

Figure S3: Cluster plots for core SNPs of orphan signals.

Supplement: 208ce93771dee668a131c3e29411c619_genetics.114.164814-2.pdf [file 208ce93771dee668a131c3e29411c619_genetics.114.164814-2.pdf]
